# Supplementary material for: Commercial photocatalyst changes the behavior of Formica pratensis and Formica polyctena
Source: Royal Society of Chemistry journal article supplement (doi:10.1039/d1en01119g), 2022-11-24
Supplement: d1en01119g1.pdf [file d1en01119g1.pdf]

## Supplementary Information for:

### Commercial photocatalyst changes the behavior of *Formica pratensis* and *Formica polyctena*

**Authors:** Zsolt Czekes<sup>1,2\*</sup>, Dóra Bai<sup>1</sup>, Judit Vincze<sup>1</sup>, Emese Gál<sup>3</sup>, Zsuzsanna Nagy<sup>1,4</sup>, Lucian Baia<sup>2,5</sup>, Zsolt Pap<sup>2,5,6\*</sup>

<sup>1</sup>Hungarian Department of Biology and Ecology, Babeş-Bolyai University, Cluj-Napoca, Romania

<sup>2</sup>Nanostructured Materials and Bio-Nano-Interfaces Center, Institute for Interdisciplinary Research on Bio-Nano-Sciences, Babeş – Bolyai University, Cluj-Napoca, Romania

<sup>3</sup>Faculty of Chemistry and Chemical Engineering, Babeş-Bolyai University, Cluj-Napoca, Romania

<sup>4</sup>Biological Research Centre, Institute of Biochemistry, MTA Lendület Laboratory of Cell Cycle Regulation, University of Szeged, Szeged, Hungary.

<sup>5</sup>Institute of Research-Development-Innovation in Applied Natural Sciences, “Babes-Bolyai” University, Cluj-Napoca, Romania

<sup>6</sup>Department of Applied and Environmental Chemistry, University of Szeged, Szeged, Hungary

#### Structural, morphological and optical analysis of P25 - instrumentation

*X-ray diffraction (XRD)* measurements were performed on a *Shimadzu 6000* diffractometer using Cu-K $\alpha$  radiation ( $\lambda = 1.5406 \text{ \AA}$ ), equipped with a graphite monochromator. The anatase - rutile phase ratio in P25 was evaluated using the Banfield’ method <sup>1</sup>, and the crystallites average size was calculated using the Scherrer equation <sup>2</sup>.

*JASCO-V650* spectrophotometer with an integration sphere (*ILV-724*) was used for measuring the *DRS spectra* of the samples ( $\lambda = 300\text{-}800 \text{ nm}$ ). To obtain the band-gap energy the reflectance data were converted to F(R) values according to the Kubelka-Munk theory <sup>3</sup>. The band gap was obtained from the plot of  $[F(R) \cdot E]^{1/2}$  versus energy of the exciting light (E).

TEM images were obtained with a FEI Tecnai F20 field emission, high resolution Transmission Electron Microscope (TEM) operating at an accelerating voltage of 200 kV and equipped with Eagle 4k CCD camera.

Microprocessor controlled surface area analyzer, Qsurf Series M1, was used for the *N<sub>2</sub> adsorption measurements*. Outgassing at 200 °C was performed for 30 min, to ensure maximum

accuracy of the obtained information. The specific surface area of the samples was evaluated on the basis of Brunauer, Emmet and Teller (BET) equation.

A photoreactor system with three LighTech 40 W fluorescent lamps ( $\lambda_{\max} \approx 365$  nm, irradiation distance = 5 cm, irradiation time = 3 hours) was used to measure *the photocatalytic activities*. The photocatalyst suspension containing phenol (initial concentration of phenol  $c_{0, \text{phenol}} = 0.5$  mM; catalyst concentration  $c_{\text{photocatalyst}} = 1.0$  g/L; total volume of the suspension  $V_{\text{susp}} = 50$  mL) was continuously purged by air in order to maintain the dissolved oxygen concentration constant during the whole experiment. The concentration decrease of the chosen organic substrate (phenol) and their degradation intermediates were followed using an *Agilent 1100 series HPLC* system.

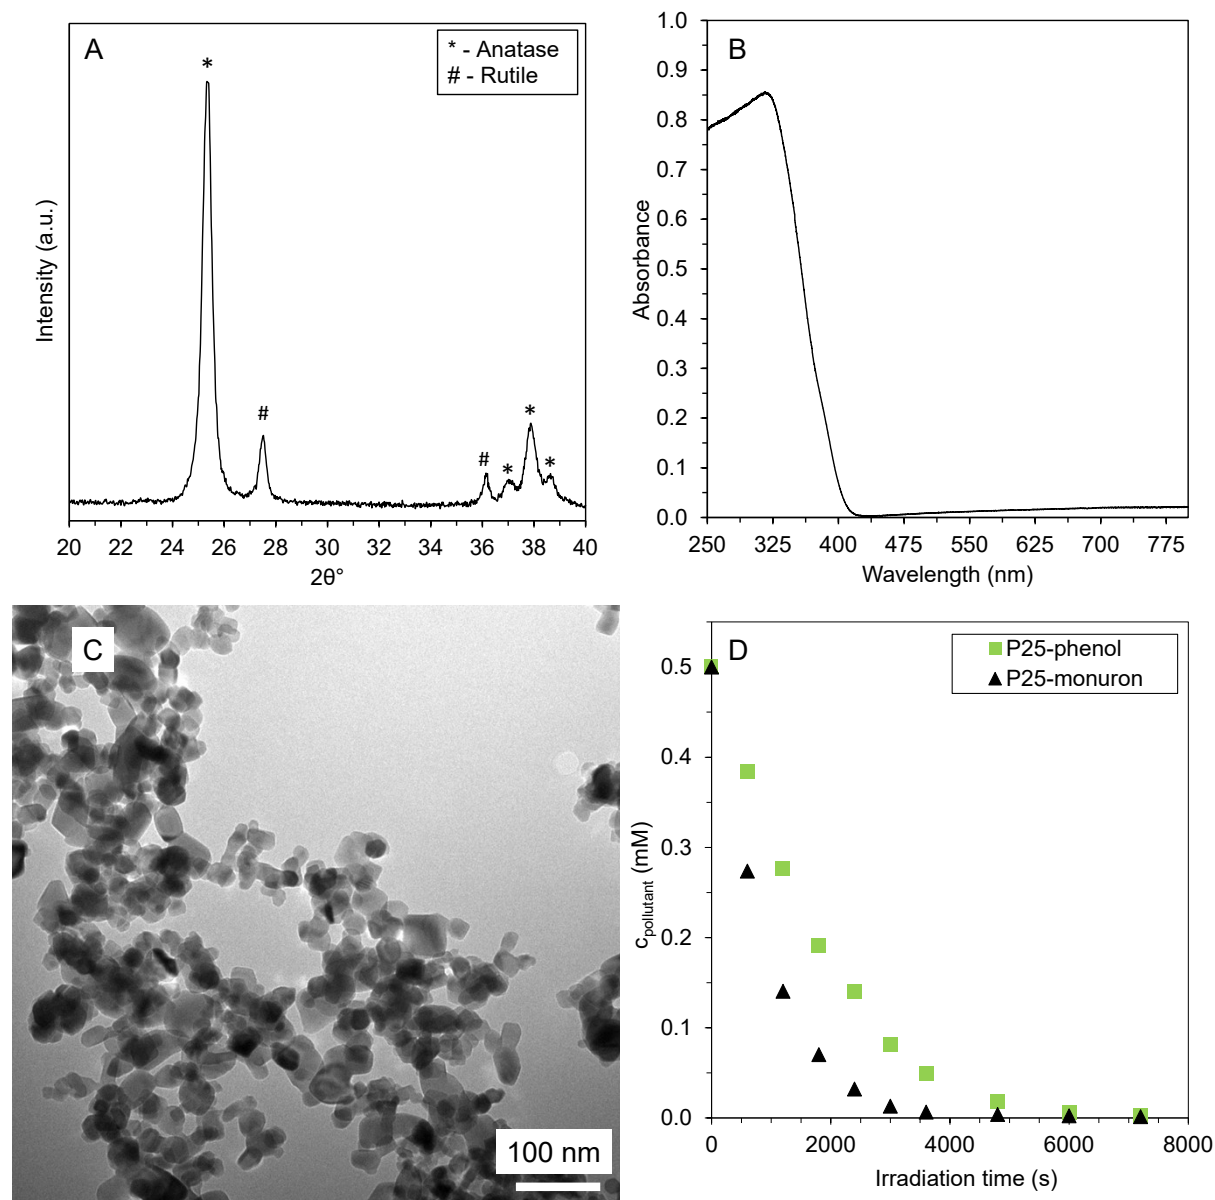

**Figure S1.** The XRD patterns of Evonik Aeroxide P25, showing, the specific signals for anatase and rutile, the first one being the main component (A), while the DRS spectrum of the material (B) demonstrates that the UV-A light is absorbed by the material, achieving the desired band-gap value). The size of the individual nanocrystals were ~25-40 nm (C) as seen in the TEM micrograph. The photoactivity was as expected from this material, as it removed in 2 hours both phenol and monuron (D) under UV-A irradiation.

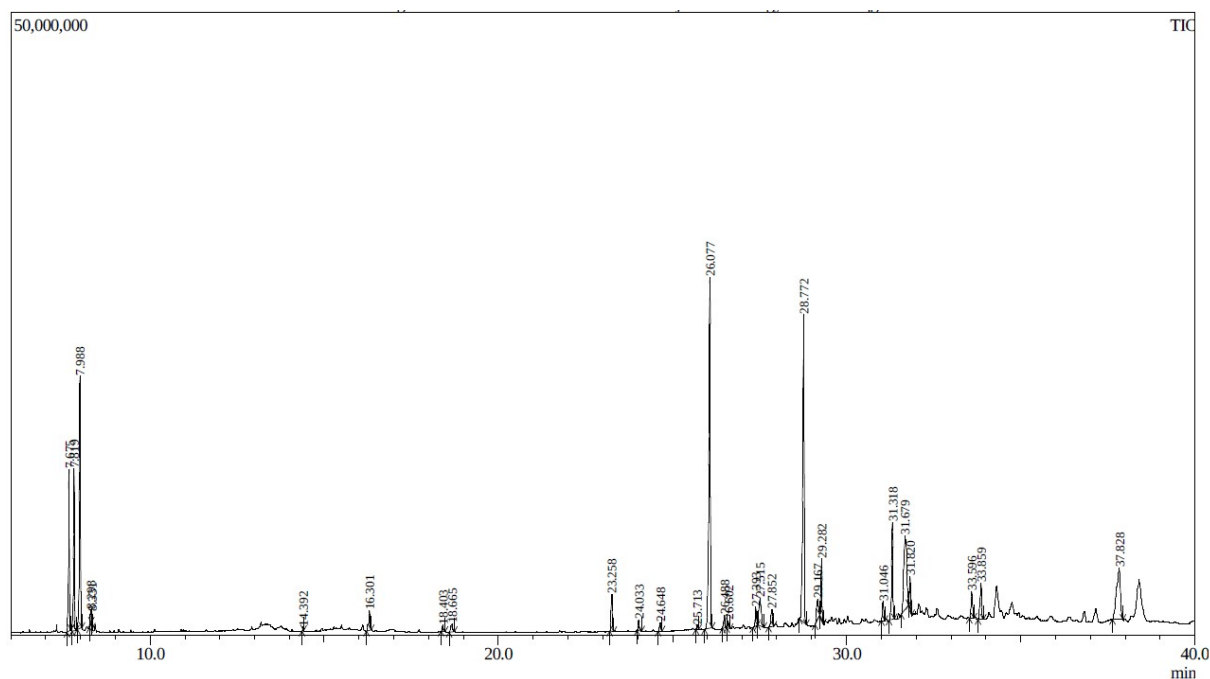

| Peak# | R.Time | I.Time | F.Time | Area      | Area%  | Height    | Height% | A/H  | Mark | Name                         |
|-------|--------|--------|--------|-----------|--------|-----------|---------|------|------|------------------------------|
| 1     | 7.675  | 7.605  | 7.730  | 23941373  | 5.68   | 12961308  | 8.67    | 1.85 | MI   | 3-methyl heptane             |
| 2     | 7.819  | 7.755  | 7.875  | 24698146  | 5.86   | 13017820  | 8.71    | 1.90 | MI   | 2,4-dimethyl-3-ethyl-pentane |
| 3     | 7.988  | 7.915  | 8.040  | 39588663  | 9.39   | 20245232  | 13.55   | 1.96 | MI   | 2,4-dimethyl-2-pentene       |
| 4     | 8.298  | 8.265  | 8.315  | 1978075   | 0.47   | 1133667   | 0.76    | 1.74 | MI   | E-4,4-dimethyl-2-pentene     |
| 5     | 8.331  | 8.315  | 8.350  | 1060810   | 0.25   | 1085578   | 0.73    | 0.98 | MI   | Z-4,4-dimethyl-2-pentene     |
| 6     | 14.392 | 14.365 | 14.415 | 436219    | 0.10   | 307693    | 0.21    | 1.42 | MI   | Myristic acid                |
| 7     | 16.301 | 16.220 | 16.350 | 4200803   | 1.00   | 1601969   | 1.07    | 2.62 | MI   | Palmitic acid                |
| 8     | 18.403 | 18.360 | 18.470 | 1067359   | 0.25   | 450837    | 0.30    | 2.37 | MI   | Oleic acid                   |
| 9     | 18.665 | 18.585 | 18.740 | 2303515   | 0.55   | 620971    | 0.42    | 3.71 | MI   | Stearic acid                 |
| 10    | 23.258 | 23.200 | 23.315 | 7312855   | 1.73   | 2988124   | 2.00    | 2.45 | MI   | Heneicosane                  |
| 11    | 24.033 | 23.980 | 24.115 | 2282846   | 0.54   | 877465    | 0.59    | 2.60 | MI   | Phthalate-din extractie      |
| 12    | 24.648 | 24.590 | 24.705 | 1756360   | 0.42   | 665195    | 0.45    | 2.64 | MI   | Pentacosane                  |
| 13    | 25.713 | 25.670 | 25.760 | 846746    | 0.20   | 343190    | 0.23    | 2.47 | MI   | Z-9-tricosene                |
| 14    | 26.077 | 25.925 | 26.140 | 84756266  | 20.11  | 28189611  | 18.87   | 3.01 | MI   | Heptacosane                  |
| 15    | 26.488 | 26.440 | 26.555 | 2807204   | 0.67   | 983464    | 0.66    | 2.85 | MI   | Octacosane                   |
| 16    | 26.602 | 26.560 | 26.655 | 1396357   | 0.33   | 596530    | 0.40    | 2.34 | MI   | 9-buthyl-docosane            |
| 17    | 27.393 | 27.315 | 27.445 | 3624459   | 0.86   | 1507493   | 1.01    | 2.40 | MI   | Nonacosane                   |
| 18    | 27.515 | 27.450 | 27.630 | 9351014   | 2.22   | 2183998   | 1.46    | 4.28 | MI   | Lonavar                      |
| 19    | 27.852 | 27.765 | 27.910 | 4395124   | 1.04   | 1391363   | 0.93    | 3.16 | MI   | Squalene                     |
| 20    | 28.772 | 28.655 | 28.845 | 73634916  | 17.47  | 24709735  | 16.54   | 2.98 | MI   | Hentriacontane               |
| 21    | 29.167 | 29.100 | 29.230 | 6595098   | 1.56   | 1643242   | 1.10    | 4.01 | MI   | Tetratriacontane             |
| 22    | 29.282 | 29.235 | 29.325 | 10965241  | 2.60   | 4891192   | 3.27    | 2.24 | MI   | Pentatriacontane             |
| 23    | 31.046 | 31.000 | 31.095 | 3840468   | 0.91   | 1526585   | 1.02    | 2.52 | MI   | 17-Pentatriacontene          |
| 24    | 31.318 | 31.225 | 31.370 | 21848094  | 5.18   | 7772272   | 5.20    | 2.81 | MI   | Hexatriacontane              |
| 25    | 31.679 | 31.575 | 31.780 | 33290102  | 7.90   | 5935305   | 3.97    | 5.61 | MI   | Androstanazol                |
| 26    | 31.820 | 31.785 | 31.865 | 5573509   | 1.32   | 2615145   | 1.75    | 2.13 | MI   | M= 365                       |
| 27    | 33.596 | 33.525 | 33.655 | 6036947   | 1.43   | 2162651   | 1.45    | 2.79 | MI   | Tritetracontane              |
| 28    | 33.859 | 33.770 | 33.920 | 10176746  | 2.41   | 2868280   | 1.92    | 3.55 | MI   | Tetraetracontane             |
| 29    | 37.828 | 37.635 | 37.935 | 31791820  | 7.54   | 4136656   | 2.77    | 7.69 | MI   | M= 491                       |
|       |        |        |        | 421557135 | 100.00 | 149412571 | 100.00  |      |      |                              |

**Figure S2.** The MS spectrum of CHC profile of *Formica Polytecta* before the interaction with the photocatalyst, showing 50x more intensive peaks than after the degradation process.

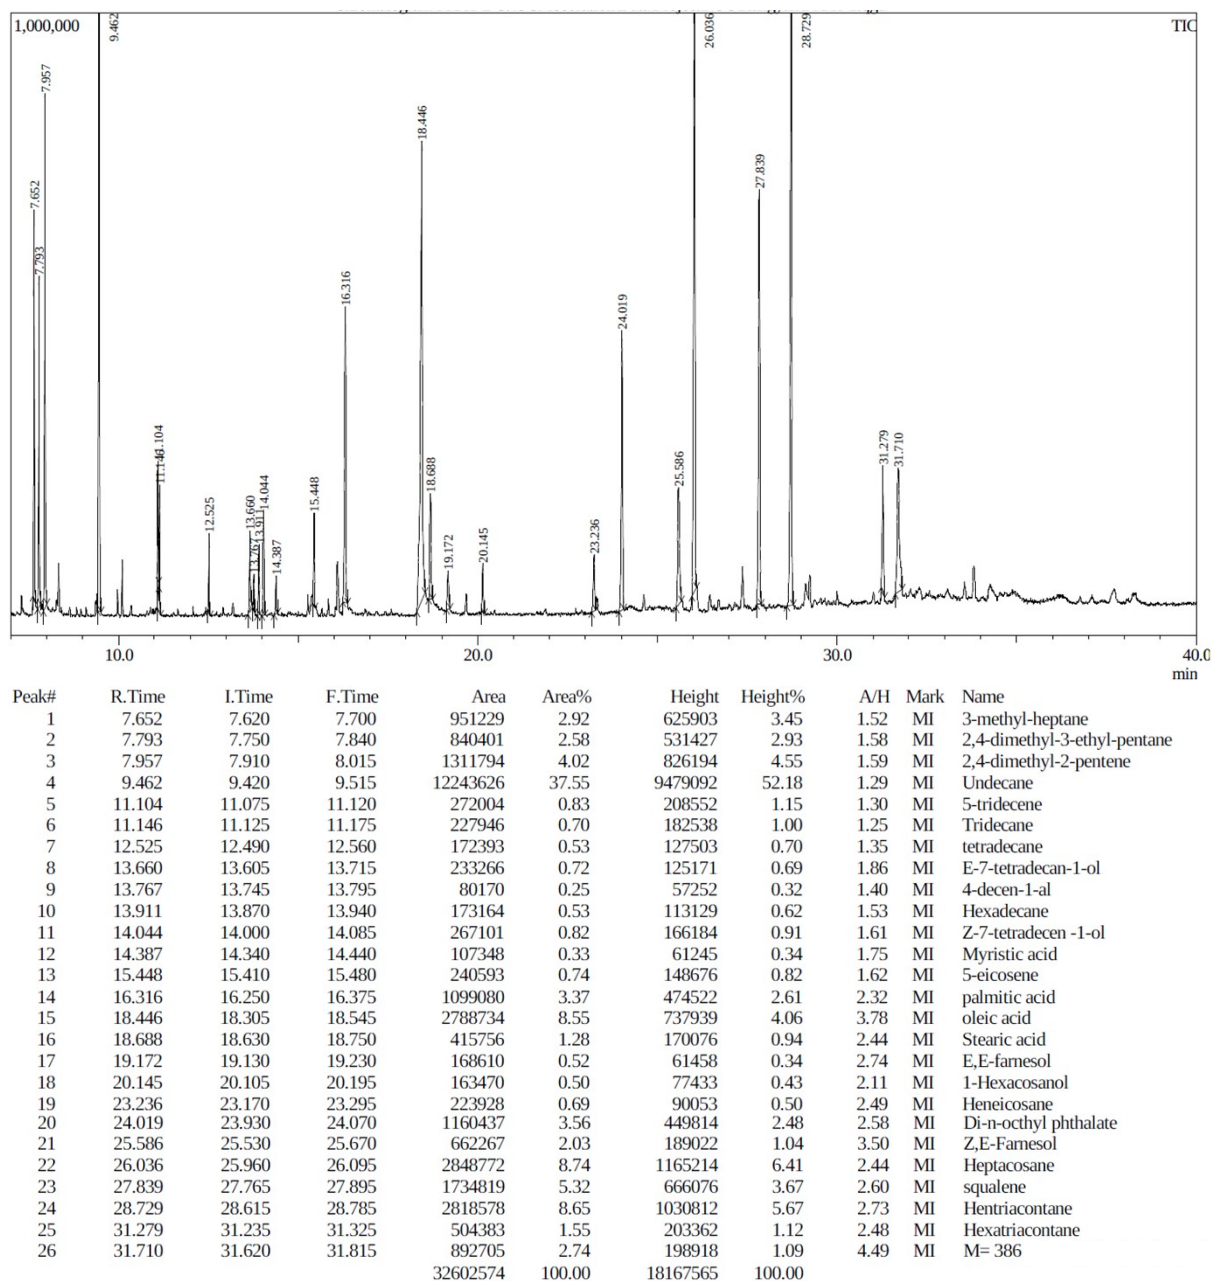

**Figure S3.** The MS spectrum of CHC profile of *Formica Polycetena* after the interaction with the photocatalyst, showing 50x more intensive peaks than after the degradation process.

## References

1. Zhang, H. & Banfield, J. F. Understanding Polymorphic Phase Transformation Behavior during Growth of Nanocrystalline Aggregates: Insights from  $\text{TiO}_2$ . *The Journal of Physical Chemistry B* **104**, 3481–3487 (2000).
2. Jenkins, R. & Snyder, R. L. *Introduction to X-ray Powder Diffractometry*. *Chemical Analysis* (1996). doi:10.1002/9781118520994.
3. Kubelka, P. and Munk, F. Ein Beitrag Zur Optik Der Farbanstriche. *Zeitschrift für Technische Physik* **12**, 593–601 (1931).
